# Supplementary material for: Meta-analysis of the association between Apolipoprotein E polymorphism and risks of myocardial infarction
Source: PubMed Central journal article supplement (PMC8952226; doi:10.1186/s12872-022-02566-0), 2022-03-24

**A****Funnel plot**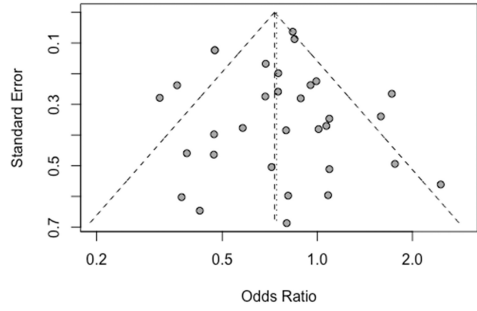**B****Funnel plot**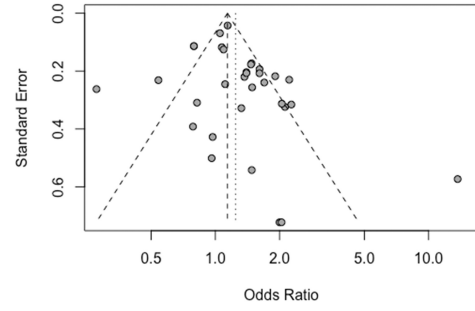**C****Funnel plot**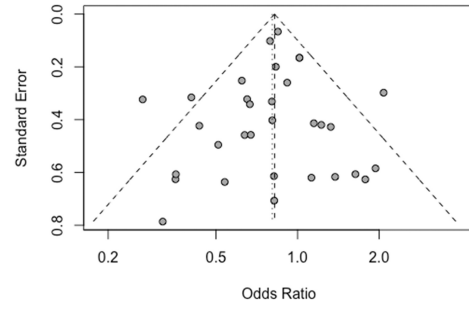**D****Funnel plot**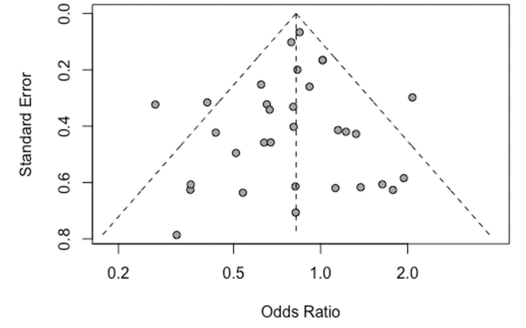**E****Funnel plot**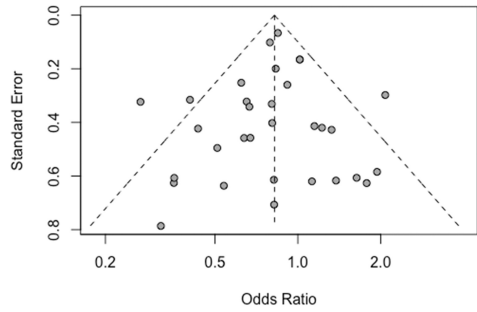**F****Funnel plot**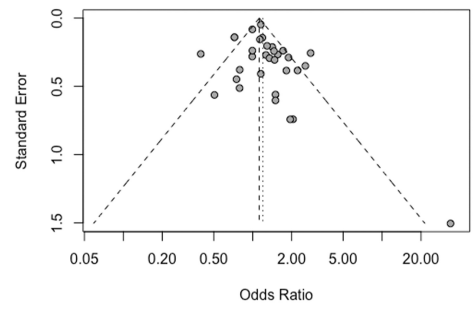**G****Funnel plot**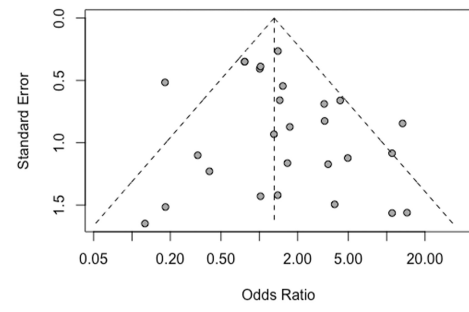

Supplement: 12872_2022_2566_MOESM1_ESM.pdf [file 12872_2022_2566_MOESM1_ESM.pdf]
