# Supplementary material for: Meta-analysis of the association between Apolipoprotein E polymorphism and risks of myocardial infarction
Source: PubMed Central journal article supplement (PMC8952226; doi:10.1186/s12872-022-02566-0), 2022-03-24

A

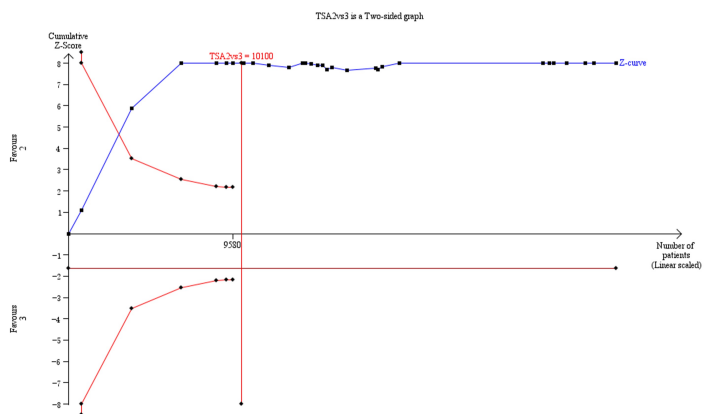

B

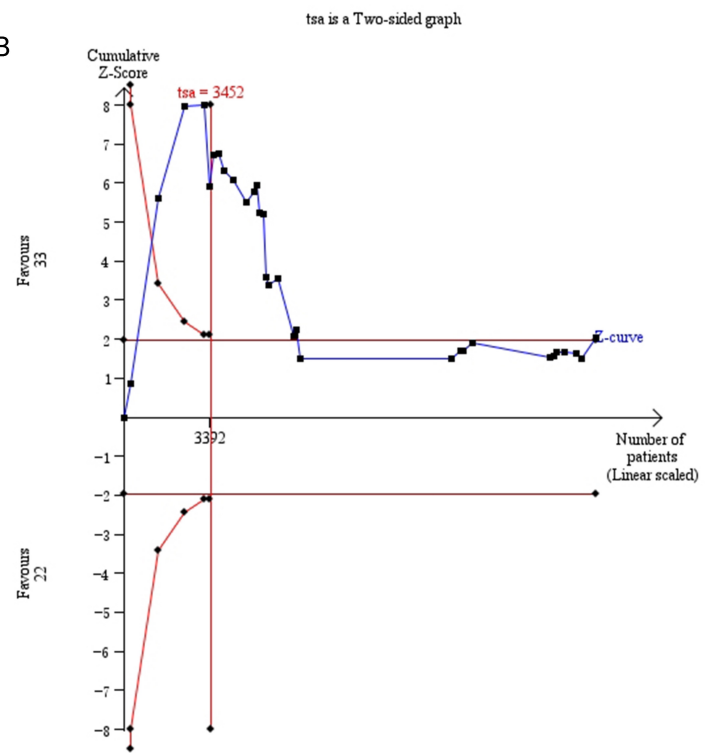

C

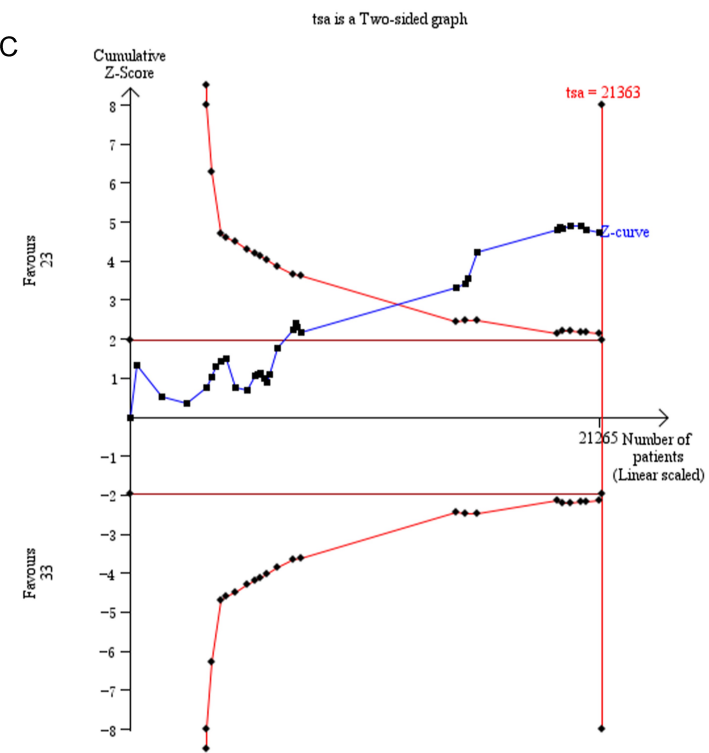

Supplement: 12872_2022_2566_MOESM2_ESM.pdf [file 12872_2022_2566_MOESM2_ESM.pdf]
